# Supplementary material for: NOD-Like Receptor Signaling in Cholesteatoma
Source: Hindawi journal article supplement (doi:10.1155/2015/408169), 2015-01-01
Supplement: f1 [file 408169.f1.pdf]

## SUPPLEMENTARY DATA

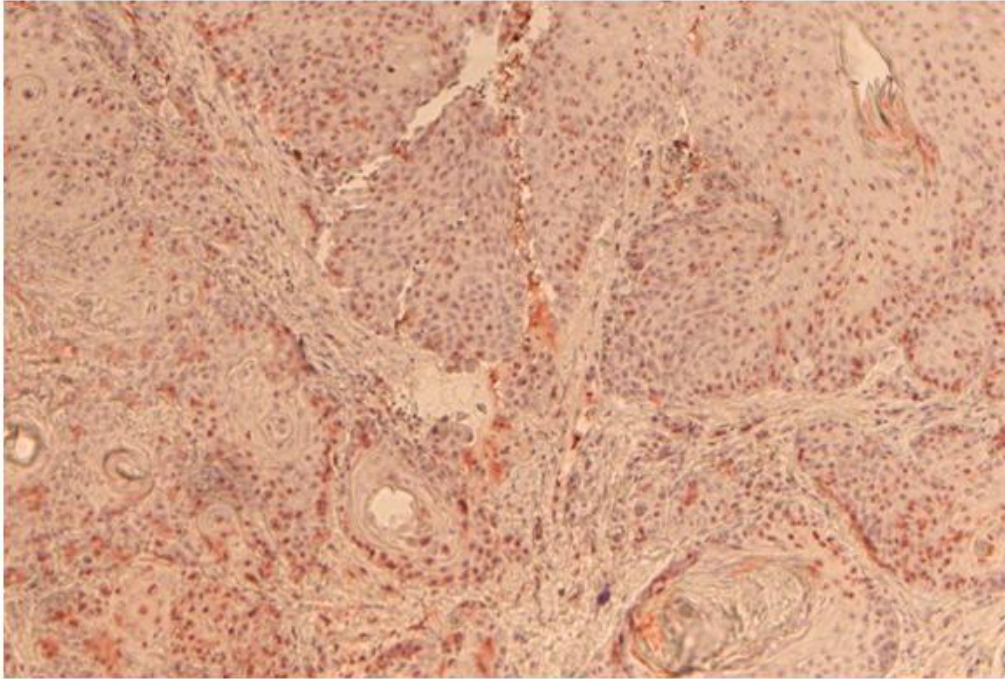

**Supplementary Figure 1. NOD2 Protein Expression in cholesteatoma.** Immunohistochemical staining with LSAB. Blue represents nuclei, orange/brown represents the target gene NOD2 mainly in the epithelial layers less subepithelial, magnification 10 x.

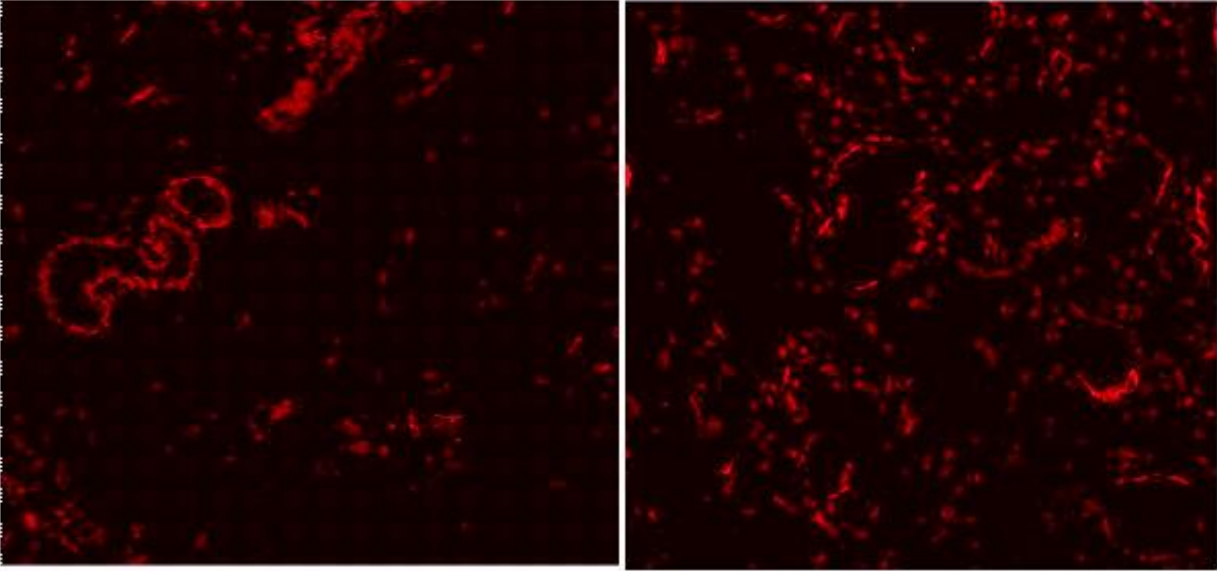

**Supplementary Figure 2. Localization of NOD2 in cholesteatoma and in external auditory canal skin (EAS).** Protein expression in cholesteatoma demonstrates a higher expression of NOD2 (red) within the cholesteatoma (right picture) compared to EAS (left picture), using a confocal microscope.
